# Supplementary material
Source: publisher site journal article supplement (https://www.dovepress.com/article/263797)
Supplement: Supplementary file 1 [file get_supplementary_file.php]

## Supplementary materials

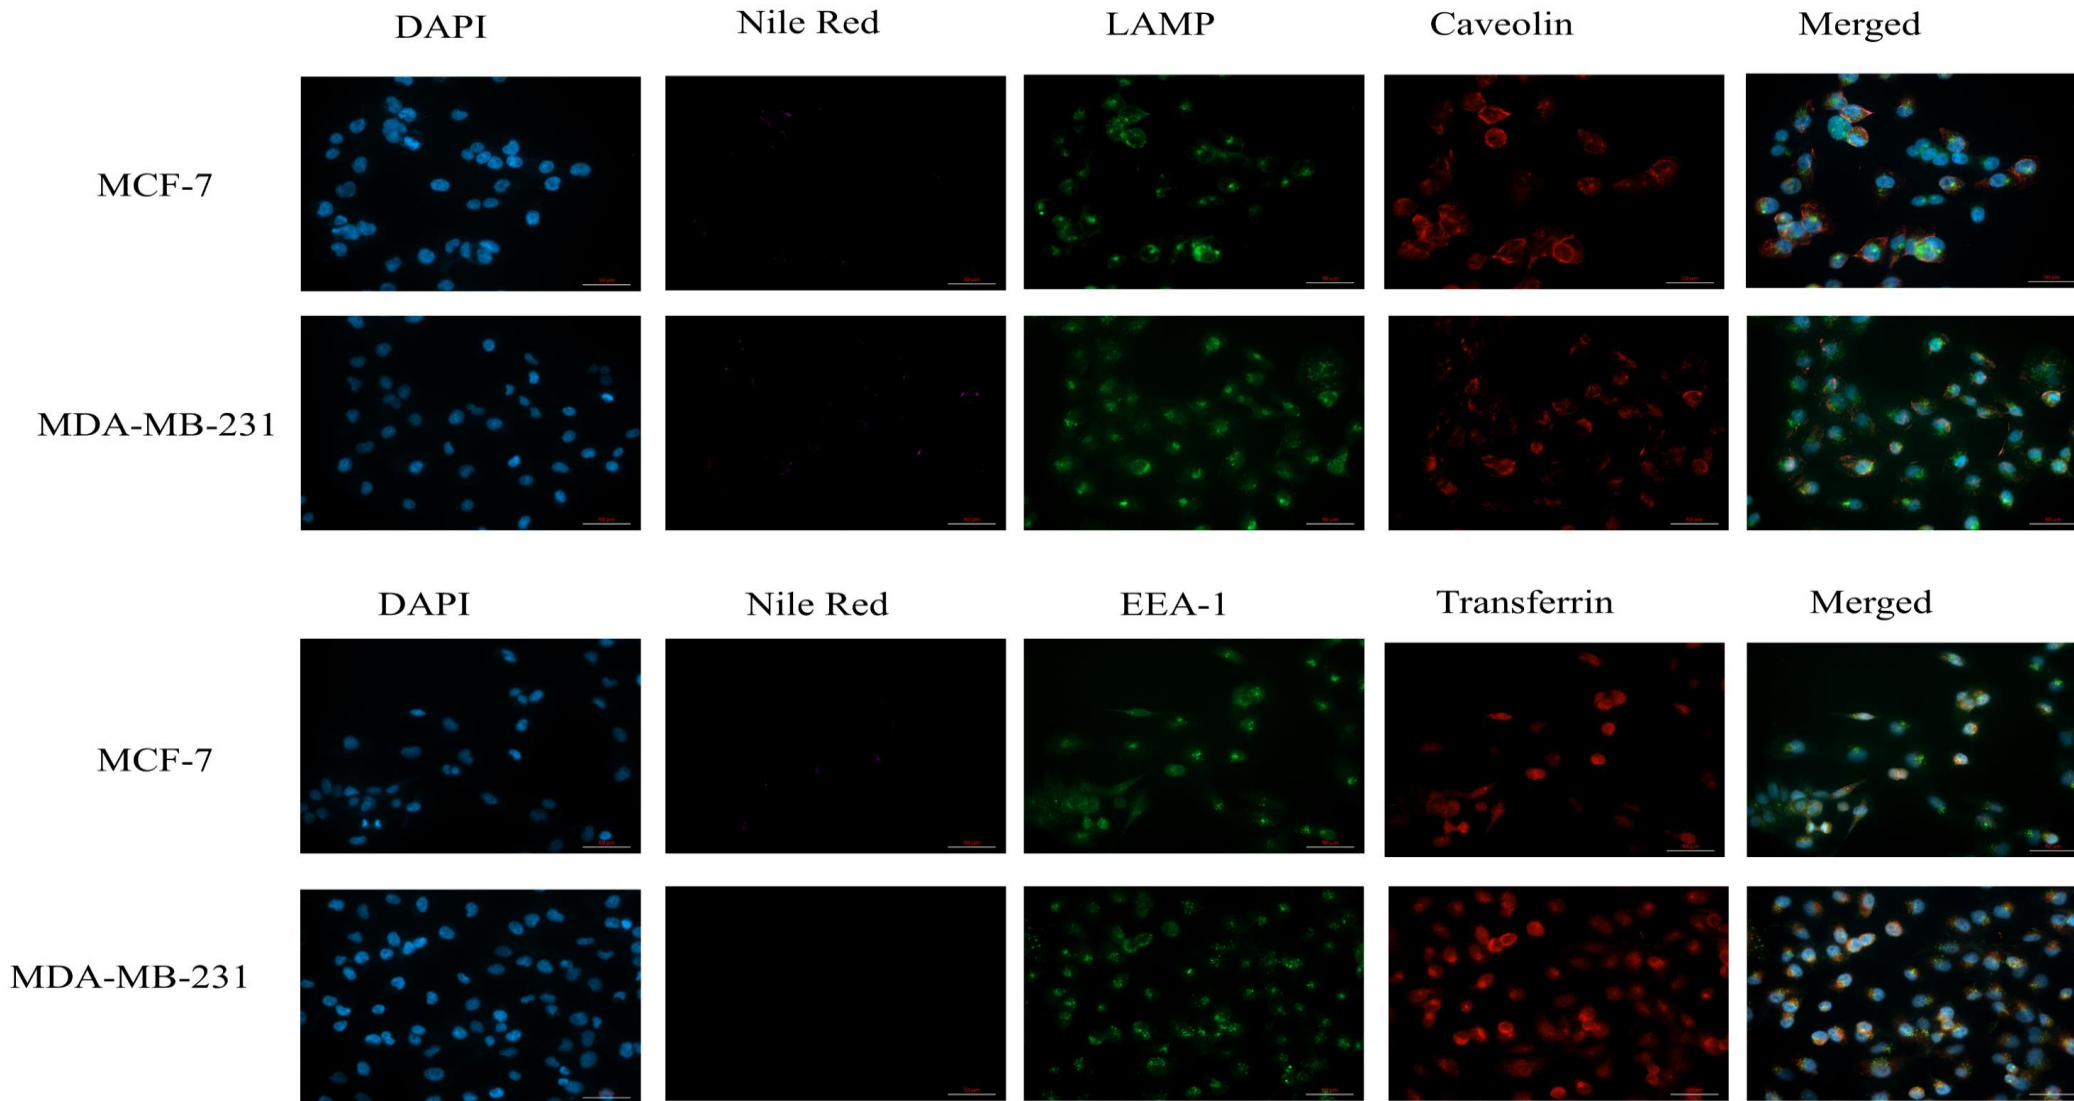

Supplementary figure 1. Immunofluorescent images of untreated MCF-7 and MDA-MB-231 cells (control), labeled with DAPI, LAMP, Caveolin, EEA-1 and Transferrin. Visualized by microscope Zeiss Axio, 40X oil immersion. Scale is 50  $\mu$ m.

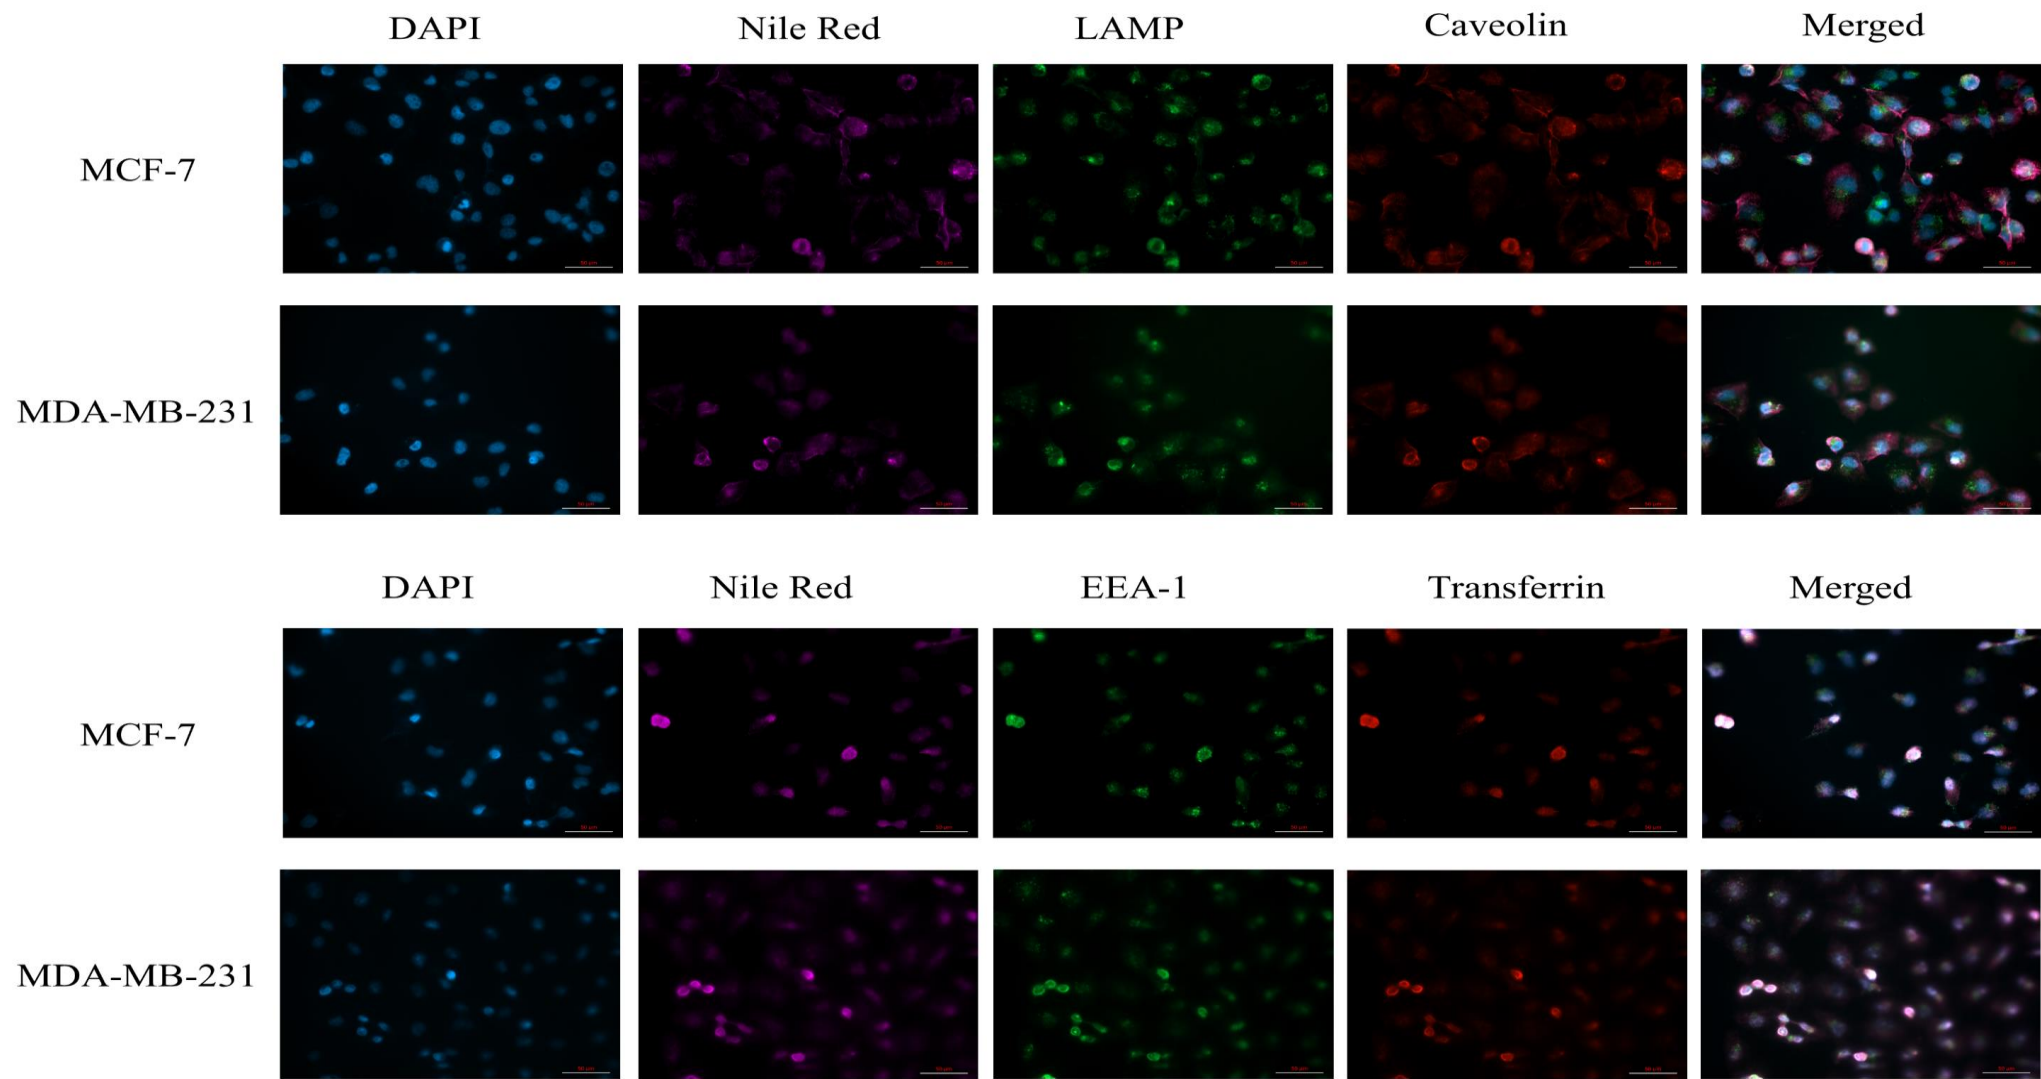

Supplementary figure 2. Mechanism of cellular uptake of blank cubosomes in MCF-7 and MDA-MB-231 cell lines. Subcellular localization of blank cubosomes labeled with Nile red in MCF-7 and MDA-MB-231 cell lines. Cells were treated with 52.5  $\mu$ M (MCF-7) and 73.4  $\mu$ M (MDA-MB-231) of blank cubosomes for 30 mins. Slides were labeled with DAPI, LAMP, Caveolin, EEA-1 and Transferrin. Visualized by microscope Zeiss Axio, 40X oil immersion. Scale is 50  $\mu$ m.
